# Supplementary material for: Capabilities and Limitations of Tissue Size Control through Passive Mechanical Forces
Source: PubMed Central journal article supplement (PMC4703071; doi:10.1371/journal.pcbi.1004679), 2015-12-29
Supplement: pcbi.1004679.s007.pdf [file pcbi.1004679.s007.pdf]

| <i>wt</i> | <i>en&gt;dap</i> | <i>en&gt;CycE</i> |
|-----------|------------------|-------------------|
| 0         | $0.02 \pm 0.14$  | $3 \pm 1.7$       |
